# Supplementary material for: Sub-optimal temperatures lead to altered expression of stress-related genes and increased ‘Candidatus Liberibacter solanacearum’ accumulation in potato psyllid
Source: Front Insect Sci. 2024 Jan 12;3:1279365. doi: 10.3389/finsc.2023.1279365 (PMC10926459; doi:10.3389/finsc.2023.1279365)
Supplement: Supplementary Table 4 — ‘Ca. L. solanacearum’-infected psyllids reared at 30° and 24°C. [file Table_4.xlsx]

## Sheet: Sheet1
Name	EVDescription	Fold change	In24 - linear total RPKM	In30 - linear total RPKM			Decreased
BcAN_23026	PREDICTED: uncharacterized protein LOC103515345	629.362	0.003	1.697			0.00176783
BcAN_14587		151.279	0.005	0.709			0.00705219
BcAN_20468	Ankyrin repeat domain protein {ECO:0000313|EMBL:CAQ55401.1}	98.9508	0.011	1.073			0.0102516
BcAN_23491	Putative membrane protein {ECO:0000313|EMBL:AGJ98877.1}	61.6581	0.008	0.523			0.0152964
BcAN_21684		45.7306	0.003	0.123			0.0243902
BcAN_15825	Uncharacterized protein {ECO:0000313|Ensembl:ENSLAFP00000023131}	33.1737	0.178	5.889			0.0302258
BcAN_00154	PREDICTED: fruit bromelain-like	18.4795	5.998	110.846			0.0541111
BcAN_05622	PREDICTED: cathepsin L1-like	18.3547	1.24	22.759			0.0544839
BcAN_01414	PREDICTED: maltase 2-like, partial	16.5387	2.053	33.947			0.0604766
BcAN_18314	Transposon Ty3-I Gag-Pol polyprotein {ECO:0000313|EMBL:JAC36326.1}	15.9077	12.344	196.357			0.0628651
BcAN_00105	NADP(H)-dependent ketose reductase {ECO:0000313|EMBL:AAD02817.1}	15.6677	47.809	749.057			0.0638256
BcAN_06568	PREDICTED: maltase 2-like, partial	15.3804	1.234	18.972			0.0650432
BcAN_01072		14.8972	2.931	43.657			0.067137
BcAN_00758		12.263	13.361	163.841			0.0815486
BcAN_06566	PREDICTED: allergen Cr-PI-like	11.8125	23.347	275.789			0.0846553
BcAN_02388		11.4945	11.265	129.481			0.0870012
BcAN_05722		11.3697	0.572	6.507			0.0879053
BcAN_01753	PREDICTED: allergen Cr-PI-like	10.9742	14.006	153.706			0.091122
BcAN_01312	PREDICTED: DNA-directed RNA polymerase II subunit 1-like, partial	10.8552	1.447	15.708			0.0921187
BcAN_05703		10.6979	46.863	501.337			0.093476
BcAN_23167		10.274	4.012	41.222			0.0973267
BcAN_06474		9.83626	51.286	504.463			0.101665
BcAN_06754		9.36549	8.567	80.235			0.106774
BcAN_00350	PREDICTED: allergen Cr-PI-like	8.85255	8.562	75.795			0.112963
BcAN_02378	PREDICTED: protein-glutamate O-methyltransferase-like	8.81566	16.336	144.014			0.113433
BcAN_00068		8.80695	13.161	115.909			0.113546
BcAN_06562		8.25335	1.109	9.153			0.121162
BcAN_02346	Cathepsin B-like cysteine peptidase {ECO:0000313|EMBL:ALX17533.1}	8.16221	5.204	42.472			0.122528
BcAN_00850	PREDICTED: allergen Cr-PI-like	7.9802	9.164	73.131			0.125309
BcAN_11038	PREDICTED: uncharacterized protein LOC103517517	7.94821	4.793	38.099			0.125804
BcAN_02487	Heat shock protein 70 A1	7.69172	118.595	912.2			0.13001
BcAN_17184	PREDICTED: zinc finger protein ush	7.67351	1.837	14.097			0.130311
BcAN_17100	Uncharacterized protein {ECO:0000313|EMBL:JAQ11010.1}	7.43321	1.478	10.984			0.134559
BcAN_06627		7.3899	3.71	27.413			0.135337
BcAN_15601	PREDICTED: uncharacterized protein LOC103521297, partial	7.04956	0.419	2.952			0.141938
BcAN_00604	PREDICTED: protein-glutamate O-methyltransferase-like	7.04332	22.125	155.832			0.14198
BcAN_00286	PREDICTED: peroxidase-like	7.04274	19.134	134.759			0.141987
BcAN_00603		6.86693	16.615	114.092			0.145628
BcAN_15041	PREDICTED: cationic amino acid transporter 3-like	6.84918	1.804	12.354			0.146026
BcAN_04693	Nocturnin {ECO:0000313|EMBL:JAG39343.1}	6.45249	12.202	78.734			0.154978
BcAN_05124	PREDICTED: uncharacterized protein LOC108253371	6.44152	3.106	20.009			0.15523
BcAN_01679		6.37092	21.38	136.209			0.156965
BcAN_02299	Heat shock protein 70 A1	6.32125	95.692	604.894			0.158196
BcAN_00376	Heat shock protein 90	6.1061	595.021	3633.26			0.16377
BcAN_07836		6.01043	4.913	29.529			0.166379
BcAN_01383		5.98962	2.964	17.752			0.166967
BcAN_00611	PREDICTED: uncharacterized protein LOC103509680	5.71623	26.46	151.249			0.174943
BcAN_02282		5.60154	25.673	143.806			0.178525
BcAN_05794		5.46229	6.773	36.995			0.183079
BcAN_11612		5.4319	2.195	11.921			0.184129
BcAN_02778	Cathepsin B-like cysteine peptidase {ECO:0000313|EMBL:ALX17533.1}	5.26391	3.034	15.969			0.189993
BcAN_18161	PREDICTED: putative histone-lysine N-methyltransferase 1	5.25663	0.374	1.965			0.190331
BcAN_11322	PREDICTED: lipase 1-like	5.24216	1.909	10.005			0.190805
BcAN_02343		5.1954	6.964	36.181			0.192477
BcAN_25202		5.1464	13.836	71.206			0.194309
BcAN_18367	Endonuclease-reverse transcriptase {ECO:0000313|EMBL:CCH14900.1}	5.06684	0.687	3.479			0.197471
BcAN_14632		5.03973	6.694	33.735			0.198429
BcAN_07293		4.98145	18.072	90.025			0.200744
BcAN_15275	Transposase {ECO:0000313|EMBL:ACN95435.1}	4.8944	0.857	4.196			0.204242
BcAN_20513	PREDICTED: carboxypeptidase D-like	4.85435	0.828	4.018			0.206073
BcAN_01475		4.82034	24.244	116.865			0.207453
BcAN_07044		4.74942	8.351	39.664			0.210544
BcAN_14525		4.71703	1.291	6.09			0.211987
BcAN_19132		4.63873	1.281	5.942			0.215584
BcAN_21129	PREDICTED: uncharacterized protein LOC103510115	4.53451	1.94	8.795			0.22058
BcAN_17595	PREDICTED: uncharacterized protein LOC103518198	4.51457	0.4	1.804			0.221729
BcAN_11521	PREDICTED: sodium-independent sulfate anion transporter-like	4.42627	3.128	13.846			0.225914
BcAN_07244		4.31494	8.704	37.558			0.231748
BcAN_01690		4.24867	6.625	28.146			0.23538
BcAN_10928	PREDICTED: uncharacterized protein LOC103521249	4.23746	1.583	6.707			0.236022
BcAN_11538	PREDICTED: twist-related protein-like	4.1827	0.393	1.644			0.239051
BcAN_07250		3.90603	16.28	63.592			0.256007
BcAN_04802		3.90286	5.536	21.608			0.256201
BcAN_06013		3.87767	13.265	51.439			0.257878
BcAN_11679	50S ribosomal protein L19 {ECO:0000255|HAMAP-Rule:MF_00402}	3.81412	0.977	3.726			0.262211
BcAN_07880		3.75049	9.347	35.057			0.266623
BcAN_06254	PREDICTED: carboxypeptidase D-like	3.6621	1.981	7.256			0.273015
BcAN_08106		3.63947	2.733	9.947			0.274756
BcAN_05217		3.63153	29.932	108.699			0.275366
BcAN_01494		3.49373	14.495	50.642			0.286225
BcAN_24869		3.41236	6.394	21.819			0.293047
BcAN_13978	Uncharacterized protein {ECO:0000313|EMBL:JAQ16549.1}	3.39664	2.027	6.884			0.294451
BcAN_00142	PREDICTED: putative per-hexamer repeat protein 5 isoform X3	3.39424	79.306	269.183			0.294617
BcAN_24173		3.37422	1.064	3.591			0.296296
BcAN_13487	PREDICTED: cadherin-3-like	3.36567	1.503	5.058			0.297153
BcAN_25769	Succinate dehydrogenase flavoprotein subunit	3.33941	0.436	1.455			0.299656
BcAN_04949	Uncharacterized protein {ECO:0000313|EMBL:OAQ70992.1}	3.33403	15.149	50.508			0.299933
BcAN_00067		3.27374	79.191	259.249			0.305463
BcAN_24241	PREDICTED: exodeoxyribonuclease-like	3.22238	2.331	7.513			0.310262
BcAN_00137	PREDICTED: phenoloxidase 3-like	3.12265	52.399	163.625			0.320238
BcAN_00220		3.10851	19.69	61.205			0.321706
BcAN_13116	PREDICTED: laccase-1-like	3.09783	7.725	23.93			0.322817
BcAN_14359		3.06939	0.558	1.714			0.325554
BcAN_14099		3.04794	8.68	26.457			0.32808
BcAN_11640		3.02677	5.22	15.798			0.330422
BcAN_17811	Uncharacterized protein {ECO:0000313|EMBL:OAM05773.1}	2.95797	0.872	2.579			0.338116
BcAN_10996	PREDICTED: cytochrome P450 4c3-like	2.92946	13.957	40.886			0.341364
BcAN_02271	PREDICTED: glutenin, high molecular weight subunit PW212-like	2.90358	23.025	66.854			0.344407
BcAN_18829	PREDICTED: putative nuclease HARBI1, partial	2.84123	2.64	7.501			0.351953
BcAN_24365	PREDICTED: aquaporin-4-like, partial	2.78494	2.152	5.994			0.359026
BcAN_05690	PREDICTED: uncharacterized protein LOC103522716, partial	2.77416	6.184	17.155			0.360478
BcAN_04340	PREDICTED: uncharacterized protein LOC103515345	2.7548	3.94	10.855			0.362966
BcAN_09942		2.752	15.394	42.364			0.363375
BcAN_08703	Heparan sulfate 2-O-sulfotransferase pipe {ECO:0000313|EMBL:KYN14977.1}	2.69872	3.115	8.406			0.370569
BcAN_23137		2.69455	33.882	91.296			0.371123
BcAN_10814	PREDICTED: uncharacterized protein LOC103504974	2.67088	93.092	248.638			0.374408
BcAN_22880	Uncharacterized protein {ECO:0000313|EMBL:KOB60681.1}	2.64777	3.865	10.235			0.377626
BcAN_22385		2.48947	1.836	4.57			0.401751
BcAN_18053	Uncharacterized protein {ECO:0000313|EMBL:EDN92179.1}	2.47741	4.174	10.341			0.403636
BcAN_15665	Uncharacterized protein {ECO:0000313|EMBL:ELU13788.1, ECO:0000313|EnsemblMetazoa:CapteP213858}	2.45363	2.93	7.189			0.407567
BcAN_00885	Neuronal calcium sensor, putative {ECO:0000313|EMBL:EEB18911.1}	2.44042	3.663	8.938			0.409823
BcAN_08836		2.39757	116.844	280.143			0.417087
BcAN_12620		2.35451	1.525	3.591			0.424673
BcAN_24989	Elongation factor Tu 2 {ECO:0000255|HAMAP-Rule:MF_00118}	2.33433	7.515	17.543			0.428376
BcAN_13997	PREDICTED: RNA-directed DNA polymerase from mobile element jockey-like	2.29801	3.049	7.007			0.435136
BcAN_11460		2.16751	2.139	4.636			0.461389
BcAN_22431	PREDICTED: LOW QUALITY PROTEIN: prolactin regulatory element-binding protein	2.16269	9.307	20.129			0.462368
BcAN_10593	PREDICTED: RNA polymerase II subunit A C-terminal domain phosphatase SSU72	2.1008	9.968	20.942			0.475981
BcAN_22882		2.07861	16.73	34.776			0.481079
BcAN_21375		1.99583	2.25	4.49			0.501114
BcAN_01031	PREDICTED: uncharacterized protein LOC103518780	1.9554	16.57	32.402			0.511388
BcAN_04358	PREDICTED: alpha-(1,6)-fucosyltransferase-like	1.86241	22.358	41.64			0.536936
BcAN_16755	PREDICTED: peroxisome biogenesis factor 10-like, partial	1.71283	8.361	14.322			0.583787
BcAN_22347	PREDICTED: histone H1-like	0.516186	66.044	34.091			1.93729
BcAN_09342	PREDICTED: histone H3	0.495837	109.583	54.335			2.0168
BcAN_23405		0.45156	19.319	8.724			2.21447
BcAN_11168	Elongation factor Tu {ECO:0000255|HAMAP-Rule:MF_00118}	0.443067	3.289	1.457			2.25738
BcAN_22902		0.425666	282.577	120.284			2.34925
BcAN_07423		0.398428	9.077	3.617			2.50954
BcAN_07548		0.391048	22.227	8.692			2.55718
BcAN_07114		0.389239	12.544	4.883			2.56891
BcAN_17117	PREDICTED: uncharacterized protein LOC103520734	0.387844	1.404	0.544			2.58088
BcAN_18570	PREDICTED: retrovirus-related Pol polyprotein from type-1 retrotransposable element R1	0.380566	2.789	1.061			2.62865
BcAN_10409		0.344193	7.29	2.509			2.90554
BcAN_00075	PREDICTED: L-dopachrome tautomerase yellow-f2-like	0.341252	199.742	68.162			2.9304
BcAN_05760	PREDICTED: putative cysteine proteinase CG12163	0.338624	209.068	70.795			2.95315
BcAN_00051	PREDICTED: uncharacterized protein LOC103521582	0.329276	109.52	36.062			3.03699
BcAN_07958	PREDICTED: putative cysteine proteinase CG12163	0.318923	82.149	26.199			3.13558
BcAN_02229	PREDICTED: putative cysteine proteinase CG12163	0.31379	207.646	65.157			3.18686
BcAN_10843	PREDICTED: sulfotransferase family cytosolic 1B member 1	0.311106	27.61	8.59			3.2142
BcAN_02710	PREDICTED: uncharacterized protein LOC103516900	0.309172	8.771	2.712			3.23414
BcAN_07599	PREDICTED: putative cysteine proteinase CG12163	0.29082	36.767	10.693			3.43842
BcAN_12296	PREDICTED: uncharacterized protein LOC103515377 isoform X2	0.288276	11.798	3.401			3.46898
BcAN_23206	Uncharacterized protein {ECO:0000313|EMBL:EEZ01457.1}	0.276735	535.126	148.088			3.61357
BcAN_00071	PREDICTED: uncharacterized protein LOC103515486	0.266302	273.136	72.737			3.75512
BcAN_09424	Putative reverse transcriptase {ECO:0000313|EMBL:JAP05074.1}	0.24675	139.879	34.515			4.0527
BcAN_21595	Tyrosine recombinase XerD {ECO:0000313|EMBL:JAG21576.1}	0.243401	3.957	0.963			4.10903
BcAN_02475	Uncharacterized protein {ECO:0000313|EMBL:EDU61869.1}	0.233841	1017.85	238.015			4.27642
BcAN_00746	PREDICTED: putative cysteine proteinase CG12163	0.228708	223.291	51.068			4.37243
BcAN_19027	Hypothetical CTC00065-like protein {ECO:0000313|EMBL:CAO85713.1}	0.214062	381.044	81.567			4.67155
BcAN_08197	Uncharacterized protein {ECO:0000313|EMBL:CDW51072.1}	0.210539	3399.59	715.748			4.74971
BcAN_02772	PREDICTED: endocuticle structural glycoprotein SgAbd-2-like isoform X2	0.207885	16.244	3.377			4.81019
BcAN_01347	PREDICTED: putative defense protein Hdd11	0.189689	46.824	8.882			5.27179
BcAN_15396	Uncharacterized protein {ECO:0000313|EMBL:CBH95374.1}	0.175508	361.171	63.388			5.69778
BcAN_11578	Uncharacterized protein {ECO:0000313|EMBL:KNA13487.1}	0.121345	207.975	25.237			8.24088
BcAN_00022	Genome polyprotein {ECO:0000256|SAAS:SAAS00495321}	0.102608	40.516	4.157			9.74645
BcAN_05138	Uncharacterized protein {ECO:0000313|EMBL:JAN00636.1}	0.0964777	44.893	4.331			10.3655
BcAN_03533	PREDICTED: vegetative cell wall protein gp1-like	0.0955671	21.453	2.05			10.4649
BcAN_02196		0.0953171	14.676	1.399			10.4904
BcAN_14563	Uncharacterized protein {ECO:0000313|EMBL:KWW26465.1}	0.0855039	12.894	1.102			11.7005
BcAN_00136	PREDICTED: uncharacterized protein LOC108253855	0.0800744	49.935	3.998			12.49
BcAN_00357		0.0692261	333.637	23.096			14.4457
BcAN_02335	Elongation factor Tu {ECO:0000256|HAMAP-Rule:MF_00118, ECO:0000256|RuleBase:RU004061}	0.0492892	13.571	0.669			20.2855
BcAN_04970	Uncharacterized protein {ECO:0000313|EMBL:EEW08769.1}	0.0442573	187.041	8.278			22.595
BcAN_21190	40S ribosomal protein S19	0.0378047	0.071	0.003			23.6667
BcAN_14577	Uncharacterized protein {ECO:0000313|EMBL:KJZ81661.1}	0.0373882	67.281	2.516			26.7413
BcAN_11095	60 kDa chaperonin 1 {ECO:0000255|HAMAP-Rule:MF_00600}	0.0344678	15.227	0.525			29.0038
BcAN_11124	Stress-70 protein, mitochondrial	0.0323997	1.416	0.046			30.7826
BcAN_25555	Fumarate hydratase class II {ECO:0000256|HAMAP-Rule:MF_00743}	0.0275784	0.157	0.004			39.25
BcAN_11798	Alanine--tRNA ligase {ECO:0000256|HAMAP-Rule:MF_00036, ECO:0000256|SAAS:SAAS00015689}	0.026506	0.102	0.003			34
BcAN_11516	D-2-hydroxyglutarate dehydrogenase {ECO:0000313|EMBL:KJZ82097.1}	0.0262686	0.103	0.003			34.3333
BcAN_19852	Uncharacterized protein {ECO:0000313|EMBL:KOS39688.1}	0.0248832	0.108	0.003			36
BcAN_11837	Indole-3-acetaldehyde dehydrogenase {ECO:0000313|EMBL:EIM23670.1}	0.0248366	0.109	0.003			36.3333
BcAN_21662	60S ribosomal protein L10-A	0.024532	0.11	0.003			36.6667
BcAN_11983	Phosphoglycerate kinase {ECO:0000256|HAMAP-Rule:MF_00145, ECO:0000256|RuleBase:RU000532}	0.02442	0.188	0.005			37.6
BcAN_11312	Histone H4	0.0240984	0.188	0.005			37.6
BcAN_14584	Phosphate acyltransferase {ECO:0000256|HAMAP-Rule:MF_00019, ECO:0000256|SAAS:SAAS00054336}	0.023807	0.683	0.016			42.6875
BcAN_20834		0.0232616	0.299	0.007			42.7143
BcAN_25788	Elongation factor G {ECO:0000256|HAMAP-Rule:MF_00054}	0.0227071	1.53	0.035			43.7143
BcAN_11758	CDP-diacylglycerol--serine O-phosphatidyltransferase {ECO:0000313|EMBL:KJZ81946.1}	0.0220347	0.122	0.003			40.6667
BcAN_25514	Putative lipid II flippase MurJ {ECO:0000256|PIRNR:PIRNR002869}	0.0215456	0.125	0.003			41.6667
BcAN_22087	UTP-glucose-1-phosphate uridylyltransferase protein {ECO:0000313|EMBL:ADR52176.1}	0.0189773	0.254	0.005			50.8
BcAN_22105	Glutamine synthetase 1	0.0188111	0.143	0.003			47.6667
BcAN_11587	Chromosomal replication initiator protein DnaA {ECO:0000256|HAMAP-Rule:MF_00377, ECO:0000256|SAAS:SAAS00009621}	0.0187838	0.144	0.003			48
BcAN_22048	DNA helicase {ECO:0000256|SAAS:SAAS00553569}	0.0186906	0.144	0.003			48
BcAN_11872	Primosomal protein N' {ECO:0000256|HAMAP-Rule:MF_00983}	0.0179342	0.15	0.003			50
BcAN_25394	ADP/ATP Translocase, NTT1 {ECO:0000313|EMBL:KJZ82382.1}	0.0173888	0.155	0.003			51.6667
BcAN_11928	UPF0721 transmembrane protein {ECO:0000256|RuleBase:RU363041}	0.0171227	0.279	0.005			55.8
BcAN_19734	Ankyrin repeat domain protein {ECO:0000313|EMBL:CDR79554.1}	0.0169203	0.26	0.004			65
BcAN_24488	ADP,ATP carrier protein	0.0169123	0.401	0.007			57.2857
BcAN_10784	MotA/TolQ/ExbB proton channel family protein {ECO:0000313|EMBL:KJZ81908.1}	0.0169085	0.159	0.003			53
BcAN_25422	Transcription termination/antitermination protein NusA {ECO:0000256|HAMAP-Rule:MF_00945}	0.0164547	0.164	0.003			54.6667
BcAN_25164	30S ribosomal protein S5 {ECO:0000256|HAMAP-Rule:MF_01307}	0.0162932	2.942	0.048			61.2917
BcAN_21457	60S ribosomal protein L3-A	0.0158121	0.171	0.003			57
BcAN_11533	ATP-dependent RNA helicase {ECO:0000313|EMBL:KJZ82333.1}	0.0157648	0.171	0.003			57
BcAN_08120		0.0153736	0.337	0.005			67.4
BcAN_18847	60S ribosomal protein {ECO:0000313|EMBL:KKK17574.1}	0.0152175	0.177	0.003			59
BcAN_11689	Cytochrome O ubiquinol oxidase subunit I {ECO:0000313|EMBL:KJZ82192.1}	0.0151774	0.178	0.003			59.3333
BcAN_19029	Uncharacterized protein {ECO:0000313|EnsemblMetazoa:ACYPI071052-PA}	0.0151544	6.293	0.095			66.2421
BcAN_08084	PREDICTED: replication factor C subunit 1-like	0.0151098	24.561	0.371			66.2022
BcAN_22066	ATP-dependent Clp protease proteolytic subunit 2 {ECO:0000255|HAMAP-Rule:MF_00444}	0.0144244	2.477	0.036			68.8056
BcAN_01524	PREDICTED: extensin-like	0.014333	51.601	0.74			69.7311
BcAN_24728	Uncharacterized protein {ECO:0000313|EMBL:ADR52380.1}	0.0142581	0.319	0.005			63.8
BcAN_11464	Uncharacterized protein {ECO:0000313|EMBL:ACT57048.1}	0.0138672	0.194	0.003			64.6667
BcAN_22060	Membrane lipoprotein lipid attachment site containing protein USSDB6D {ECO:0000313|EMBL:KJZ81363.1}	0.0138207	0.195	0.003			65
BcAN_12036	Cell division protein FtsA {ECO:0000256|HAMAP-Rule:MF_02033, ECO:0000256|PIRNR:PIRNR003101}	0.0135765	0.199	0.003			66.3333
BcAN_22093	NADH-quinone oxidoreductase subunit F 1	0.0133429	0.355	0.005			71
BcAN_06699	Inosine-5'-monophosphate dehydrogenase {ECO:0000256|HAMAP-Rule:MF_01964, ECO:0000256|RuleBase:RU003928}	0.0130973	0.348	0.005			69.6
BcAN_24683	Uncharacterized protein {ECO:0000313|EMBL:KJZ82544.1}	0.012404	0.371	0.005			74.2
BcAN_20160	Collagen alpha-2(I) chain {ECO:0000313|EMBL:KDR07013.1}	0.0123495	0.377	0.005			75.4
BcAN_11776	Uncharacterized protein {ECO:0000313|EMBL:KJZ81586.1}	0.0123397	0.219	0.003			73
BcAN_11936	Ribosomal protein L29 {ECO:0000313|EMBL:CRL19218.1}	0.0118609	0.629	0.007			89.8571
BcAN_06854		0.0117005	0.368	0.004			92
BcAN_14594	Glutamine--fructose-6-phosphate aminotransferase [isomerizing] {ECO:0000256|HAMAP-Rule:MF_00164, ECO:0000256|SAAS:SAAS00319018}	0.0114737	0.235	0.003			78.3333
BcAN_07068	Diaminopimelate epimerase {ECO:0000256|HAMAP-Rule:MF_00197, ECO:0000256|SAAS:SAAS00316707}	0.0113518	0.238	0.003			79.3333
BcAN_11476	Diguanylate cyclase/phosphodiesterase (GGDEF & EAL domains) with PAS/PAC sensor(S) {ECO:0000313|EMBL:KJZ82197.1}	0.011172	0.241	0.003			80.3333
BcAN_11695	Glutamate--tRNA ligase {ECO:0000256|HAMAP-Rule:MF_00022}	0.0110071	0.245	0.003			81.6667
BcAN_01573	PREDICTED: predicted GPI-anchored protein 58	0.0108132	49.432	0.535			92.3963
BcAN_10976	Pseudouridine synthase {ECO:0000256|RuleBase:RU003887}	0.010575	0.255	0.003			85
BcAN_11854	DNA polymerase I {ECO:0000313|EMBL:KJZ81862.1}	0.0104801	0.257	0.003			85.6667
BcAN_12046	Polar-differentiation response regulator DivK	0.010332	0.813	0.008			101.625
BcAN_07729	Uncharacterized protein {ECO:0000313|EMBL:JAN72542.1}	0.0102316	349.279	3.574			97.7278
BcAN_11749	Ribosomal RNA small subunit methyltransferase E {ECO:0000256|PIRNR:PIRNR015601}	0.0100019	0.439	0.004			109.75
BcAN_14590	Pyruvate dehydrogenase E1 component subunit alpha {ECO:0000256|RuleBase:RU361139}	0.00995991	0.762	0.008			95.25
BcAN_02075	Uncharacterized protein {ECO:0000313|EMBL:ADR52475.1}	0.00989714	1.507	0.015			100.467
BcAN_24299	Mitochondrial carrier protein {ECO:0000313|EMBL:KGO65023.1}	0.00977946	0.276	0.003			92
BcAN_25367	16 kDa heat shock protein A {ECO:0000313|EMBL:KJZ81993.1}	0.00971786	7.1	0.069			102.899
BcAN_22085	Serine--tRNA ligase {ECO:0000256|HAMAP-Rule:MF_00176}	0.00955117	0.282	0.003			94
BcAN_22102	Transcription termination/antitermination protein NusG {ECO:0000256|HAMAP-Rule:MF_00948, ECO:0000256|SAAS:SAAS00078489}	0.00933354	1.057	0.01			105.7
BcAN_11276	Uncharacterized protein {ECO:0000313|EMBL:KJZ82145.1}	0.00933188	0.289	0.003			96.3333
BcAN_14593	NADPH-dependent 7-cyano-7-deazaguanine reductase {ECO:0000256|HAMAP-Rule:MF_00818, ECO:0000256|SAAS:SAAS00184002}	0.00930051	0.29	0.003			96.6667
BcAN_07345	Flagellar motor rotation protein MotA {ECO:0000313|EMBL:KJZ82024.1}	0.00919649	0.514	0.005			102.8
BcAN_21194		0.0088719	0.584	0.005			116.8
BcAN_12186	Uncharacterized protein {ECO:0000313|EMBL:JAL41167.1}	0.0085453	3.529	0.03			117.633
BcAN_12011	ATP-dependent protease subunit HslV {ECO:0000255|HAMAP-Rule:MF_00248}	0.00851901	0.854	0.007			122
BcAN_22097	30S ribosomal protein S4 {ECO:0000256|HAMAP-Rule:MF_01306}	0.00828157	0.561	0.005			112.2
BcAN_11430	Uncharacterized protein {ECO:0000313|EMBL:KJZ81301.1}	0.00827732	0.326	0.003			108.667
BcAN_11244	Glutamine synthetase type I {ECO:0000313|EMBL:KJZ81811.1}	0.00816052	0.33	0.003			110
BcAN_11614	Dihydrolipoyl dehydrogenase {ECO:0000256|RuleBase:RU003692}	0.00814687	0.776	0.006			129.333
BcAN_11609	Ribosome maturation factor RimP {ECO:0000256|HAMAP-Rule:MF_01077, ECO:0000256|SAAS:SAAS00001667}	0.00789528	2.029	0.016			126.812
BcAN_14341	UvrABC system protein C {ECO:0000256|HAMAP-Rule:MF_00203, ECO:0000256|SAAS:SAAS00511277}	0.00782553	0.579	0.005			115.8
BcAN_01507	PREDICTED: cuticle protein 65-like	0.007729	361.078	2.791			129.372
BcAN_11050	Protein GrpE {ECO:0000256|HAMAP-Rule:MF_01151, ECO:0000256|RuleBase:RU000639}	0.0077255	0.349	0.003			116.333
BcAN_01672	Ribosomal protein S30 {ECO:0000313|EMBL:EIM19190.1}	0.00769212	0.608	0.005			121.6
BcAN_11072	Uncharacterized protein {ECO:0000313|EMBL:KJZ81497.1}	0.00767567	0.351	0.003			117
BcAN_11818	ISSpo3, transposase {ECO:0000313|EMBL:KJZ81627.1}	0.00763206	0.353	0.003			117.667
BcAN_25337	Uncharacterized protein {ECO:0000313|EMBL:ADR52314.1}	0.0075277	0.358	0.003			119.333
BcAN_11646	50S ribosomal protein L28 {ECO:0000256|HAMAP-Rule:MF_00373}	0.00750513	1.149	0.009			127.667
BcAN_14298	Sensory histidine kinase AtoS {ECO:0000313|EMBL:KJZ82267.1}	0.00737067	0.366	0.003			122
BcAN_06765	C4-dicarboxylate transport protein {ECO:0000313|EMBL:KJZ82327.1}	0.00722079	0.373	0.003			124.333
BcAN_11970	Alcohol dehydrogenase {ECO:0000313|EMBL:KJZ81707.1}	0.00713668	0.378	0.003			126
BcAN_25615	UDP-3-O-acylglucosamine N-acyltransferase {ECO:0000256|HAMAP-Rule:MF_00523}	0.00710923	0.642	0.005			128.4
BcAN_14598	Peptidase family M23 {ECO:0000313|EMBL:KJZ82334.1}	0.00707879	0.381	0.003			127
BcAN_12018	Proton/glutamate symport protein Sodium/glutamate symport protein {ECO:0000313|EMBL:KJZ81660.1}	0.0070129	0.384	0.003			128
BcAN_15895	PREDICTED: skin secretory protein xP2-like	0.00700119	9.889	0.069			143.319
BcAN_11892	Phosphoribosylaminoimidazole-succinocarboxamide synthase {ECO:0000256|HAMAP-Rule:MF_00137}	0.00679696	0.397	0.003			132.333
BcAN_24187	Uncharacterized protein {ECO:0000313|EMBL:KZS00011.1}	0.00665214	2.709	0.018			150.5
BcAN_11174	RNA polymerase sigma factor RpoH {ECO:0000256|HAMAP-Rule:MF_00961}	0.00662008	0.952	0.006			158.667
BcAN_11877	Transcription regulator protein {ECO:0000313|EMBL:ADR52006.1}	0.00652423	0.413	0.003			137.667
BcAN_06861	tRNA/rRNA methyltransferase protein {ECO:0000313|EMBL:ADR51805.1}	0.00647096	0.614	0.004			153.5
BcAN_11691	ATP synthase subunit a {ECO:0000256|HAMAP-Rule:MF_01393, ECO:0000256|RuleBase:RU000483}	0.00643501	1.245	0.008			155.625
BcAN_12014	Carbonic anhydrase {ECO:0000256|RuleBase:RU003956}	0.00642918	0.419	0.003			139.667
BcAN_12032	Phosphatidylcholine synthase {ECO:0000256|PIRNR:PIRNR000851}	0.00642514	0.42	0.003			140
BcAN_02016	50S ribosomal protein L14 {ECO:0000256|HAMAP-Rule:MF_01367, ECO:0000256|RuleBase:RU003950}	0.00636627	1.201	0.008			150.125
BcAN_25068	3-oxoacyl-[acyl-carrier-protein] synthase 2 {ECO:0000256|PIRNR:PIRNR000447}	0.00634037	1.776	0.011			161.455
BcAN_23326	50S ribosomal protein L16 {ECO:0000255|HAMAP-Rule:MF_01342}	0.00630201	1.714	0.011			155.818
BcAN_22046	Ribosomal silencing factor RsfS {ECO:0000256|HAMAP-Rule:MF_01477}	0.00629494	0.721	0.005			144.2
BcAN_01870	Biotin carboxyl carrier protein of acetyl-CoA carboxylase {ECO:0000313|EMBL:KJZ81851.1}	0.00618934	1.231	0.008			153.875
BcAN_05936	Protease IV {ECO:0000313|EMBL:KJZ82081.1}	0.00618658	1.762	0.011			160.182
BcAN_11949	Flagellar basal-body rod protein FlgF {ECO:0000313|EMBL:KJZ82642.1}	0.00591499	0.756	0.004			189
BcAN_11635	Uncharacterized protein {ECO:0000313|EMBL:KJZ82211.1}	0.00589256	0.725	0.004			181.25
BcAN_01835	Ripening-related protein 3 {ECO:0000313|EMBL:JAD14215.1}	0.00577814	2.556	0.015			170.4
BcAN_10907	RNA polymerase sigma factor RpoD {ECO:0000256|HAMAP-Rule:MF_00963}	0.00532786	2.223	0.012			185.25
BcAN_22077	30S ribosomal protein S1 {ECO:0000256|PIRNR:PIRNR002111}	0.00516787	0.522	0.003			174
BcAN_22088	tRNA-specific 2-thiouridylase MnmA {ECO:0000256|HAMAP-Rule:MF_00144}	0.00514871	1.459	0.008			182.375
BcAN_24565	ATP-dependent zinc metalloprotease FtsH {ECO:0000255|HAMAP-Rule:MF_01458}	0.00511173	0.528	0.003			176
BcAN_22079	Lysophospholipase {ECO:0000313|EMBL:KJZ81859.1}	0.00500885	0.538	0.003			179.333
BcAN_11955	Glyceraldehyde-3-phosphate dehydrogenase {ECO:0000256|RuleBase:RU361160}	0.00497214	0.542	0.003			180.667
BcAN_14609	PREDICTED: DNA-directed RNA polymerase II subunit RPB1-like	0.00485673	0.942	0.005			188.4
BcAN_11912	Bifunctional protein GlmU {ECO:0000256|HAMAP-Rule:MF_01631, ECO:0000256|SAAS:SAAS00083647}	0.00484618	0.556	0.003			185.333
BcAN_11659	Uncharacterized protein {ECO:0000313|EMBL:KJZ81787.1}	0.00473704	0.952	0.005			190.4
BcAN_22083	Inosine-5'-monophosphate dehydrogenase {ECO:0000255|HAMAP-Rule:MF_01964}	0.0047119	0.881	0.004			220.25
BcAN_06279	NADH-ubiquinone oxidoreductase chain F {ECO:0000313|EMBL:KJZ81339.1}	0.00470588	0.977	0.005			195.4
BcAN_22090	50S ribosomal protein L21 {ECO:0000256|HAMAP-Rule:MF_01363, ECO:0000256|RuleBase:RU000562}	0.00466973	1.169	0.005			233.8
BcAN_06440	5-formyltetrahydrofolate cyclo-ligase {ECO:0000256|RuleBase:RU361279}	0.00461443	0.967	0.004			241.75
BcAN_11946	Large-conductance mechanosensitive channel {ECO:0000313|EMBL:KJZ82033.1}	0.00461357	1.879	0.009			208.778
BcAN_22045	Uncharacterized protein {ECO:0000313|EMBL:KJZ82493.1}	0.00458285	0.588	0.003			196
BcAN_07347	50S ribosomal protein L2 {ECO:0000256|HAMAP-Rule:MF_01320}	0.00448171	0.602	0.003			200.667
BcAN_11896	Flagellar motor rotation protein MotB {ECO:0000313|EMBL:KJZ82416.1}	0.0044695	0.603	0.003			201
BcAN_06601	Flp pilus assembly protein RcpC/CpaB {ECO:0000313|EMBL:KJZ82063.1}	0.00446474	1.901	0.008			237.625
BcAN_11654	Exodeoxyribonuclease 7 large subunit {ECO:0000256|HAMAP-Rule:MF_00378, ECO:0000256|RuleBase:RU004355, ECO:0000256|SAAS:SAAS00194689}	0.0044046	1.339	0.006			223.167
BcAN_11394	Succinate--CoA ligase [ADP-forming] subunit beta {ECO:0000255|HAMAP-Rule:MF_00558}	0.00424302	2.961	0.013			227.769
BcAN_12008	Peptidyl-prolyl cis-trans isomerase PpiD {ECO:0000313|EMBL:KJZ81646.1}	0.00423015	0.637	0.003			212.333
BcAN_11457	Succinyl-diaminopimelate desuccinylase {ECO:0000256|HAMAP-Rule:MF_01690, ECO:0000256|SAAS:SAAS00082787}	0.00421681	0.639	0.003			213
BcAN_11935	Secretin RcpA/CpaC-like protein, associated with Flp pilus assembly {ECO:0000313|EMBL:KJZ82071.1}	0.00407707	1.825	0.007			260.714
BcAN_11736	Ferritin {ECO:0000256|RuleBase:RU361145}	0.0039868	1.923	0.008			240.375
BcAN_12074	Aconitate hydratase {ECO:0000256|RuleBase:RU361275}	0.0038693	1.173	0.005			234.6
BcAN_11795	Succinate--CoA ligase [ADP-forming] subunit alpha {ECO:0000256|RuleBase:RU000699}	0.0038686	2.023	0.008			252.875
BcAN_22075	50S ribosomal protein L3 {ECO:0000256|HAMAP-Rule:MF_01325, ECO:0000256|RuleBase:RU003906}	0.00369871	1.894	0.007			270.571
BcAN_12028	Chaperone protein ClpB	0.00364842	0.739	0.003			246.333
BcAN_02112	50S ribosomal protein L5 {ECO:0000256|HAMAP-Rule:MF_01333}	0.00359913	2.969	0.011			269.909
BcAN_12051	Uncharacterized protein {ECO:0000313|EMBL:KJZ82259.1}	0.00336484	1.211	0.004			302.75
BcAN_22052	Glycosyl transferase, group 2 family protein {ECO:0000313|EMBL:KJZ81769.1}	0.00335325	1.15	0.004			287.5
BcAN_24451	Iron-sulfur cluster carrier protein {ECO:0000256|HAMAP-Rule:MF_02040}	0.00333688	0.808	0.003			269.333
BcAN_11495	Membrane protein {ECO:0000313|EMBL:KJZ82223.1}	0.00333046	4.002	0.013			307.846
BcAN_06463	tRNA dimethylallyltransferase {ECO:0000256|HAMAP-Rule:MF_00185, ECO:0000256|RuleBase:RU003783}	0.00325828	0.828	0.003			276
BcAN_25043	Alcohol dehydrogenase {ECO:0000313|EMBL:KJZ81707.1}	0.00319889	0.843	0.003			281
BcAN_02143	Uncharacterized protein {ECO:0000313|EMBL:KJZ82648.1}	0.00305633	0.882	0.003			294
BcAN_14579	DNA-directed RNA polymerase subunit beta' {ECO:0000256|HAMAP-Rule:MF_01322}	0.0030322	0.889	0.003			296.333
BcAN_25492	DNA gyrase subunit A {ECO:0000256|HAMAP-Rule:MF_01897}	0.00301727	0.894	0.003			298
BcAN_14580	Translation initiation factor IF-2 {ECO:0000255|HAMAP-Rule:MF_00100}	0.00294773	1.281	0.004			320.25
BcAN_09034	Uncharacterized protein {ECO:0000313|EMBL:JAG56252.1}	0.00293264	0.919	0.003			306.333
BcAN_11678	Uncharacterized protein {ECO:0000313|EMBL:KJZ81588.1}	0.00286639	0.941	0.003			313.667
BcAN_02769	PREDICTED: pupal cuticle protein-like	0.00282511	122.681	0.347			353.548
BcAN_25549	D-alanine--D-alanine ligase {ECO:0000256|HAMAP-Rule:MF_00047}	0.00281248	0.959	0.003			319.667
BcAN_25709	Membrane-bound lytic murein transglycosylase B {ECO:0000313|EMBL:KJZ82406.1}	0.00279734	0.964	0.003			321.333
BcAN_14572	Malonyl CoA-acyl carrier protein transacylase {ECO:0000256|PIRNR:PIRNR000446}	0.00276405	3.269	0.009			363.222
BcAN_01630	Uncharacterized protein {ECO:0000313|EMBL:KJZ81350.1}	0.00275103	8.11	0.022			368.636
BcAN_11327	Cell division protein FtsZ 1 {ECO:0000255|HAMAP-Rule:MF_00909}	0.00272298	1.599	0.004			399.75
BcAN_11687	50S ribosomal protein L2 {ECO:0000256|HAMAP-Rule:MF_01320}	0.00272197	1.605	0.004			401.25
BcAN_11468	DNA-directed RNA polymerase subunit beta {ECO:0000255|HAMAP-Rule:MF_01321}	0.00264908	1.951	0.005			390.2
BcAN_11561	50S ribosomal protein L1 {ECO:0000255|HAMAP-Rule:MF_01318}	0.00261121	4.16	0.011			378.182
BcAN_23446	Uncharacterized protein {ECO:0000313|EMBL:ADR51784.1}	0.00248325	1.086	0.003			362
BcAN_11543	Type II/IV secretion system secretin RcpA/CpaC, associated with Flp pilus assembly {ECO:0000313|EMBL:KJZ82062.1}	0.0024479	2.723	0.007			389
BcAN_25471	Flagellar basal body rod protein FlgB {ECO:0000313|EMBL:ADR51851.1}	0.0024437	1.103	0.003			367.667
BcAN_05988	30S ribosomal protein S19 {ECO:0000256|HAMAP-Rule:MF_00531}	0.00242279	3.246	0.008			405.75
BcAN_11680	Flagellin {ECO:0000256|RuleBase:RU362073}	0.00233816	6.594	0.015			439.6
BcAN_22076	ATP-dependent protease ATPase subunit HslU {ECO:0000256|SAAS:SAAS00385058}	0.00225477	2.063	0.005			412.6
BcAN_07760		0.00219227	2.177	0.005			435.4
BcAN_25341	30S ribosomal protein S3 {ECO:0000255|HAMAP-Rule:MF_01309}	0.00219146	1.23	0.003			410
BcAN_11849	Peptidase family M23 {ECO:0000313|EMBL:KJZ82334.1}	0.00212368	1.27	0.003			423.333
BcAN_22072	Flagellar basal-body rod protein FlgF {ECO:0000313|EMBL:KJZ82642.1}	0.00212255	1.27	0.003			423.333
BcAN_06815	Uncharacterized protein {ECO:0000313|EMBL:KJZ81682.1}	0.00210658	1.28	0.003			426.667
BcAN_11361	C4-dicarboxylate transport protein {ECO:0000313|EMBL:KJZ82327.1}	0.00201719	5.768	0.012			480.667
BcAN_06741	Flagellar basal-body rod protein FlgC {ECO:0000256|RuleBase:RU362062}	0.0019981	1.35	0.003			450
BcAN_24772	DNA helicase {ECO:0000256|SAAS:SAAS00553569}	0.00198403	1.359	0.003			453
BcAN_06956	Glycerol-3-phosphate dehydrogenase [NAD(P)+] {ECO:0000256|HAMAP-Rule:MF_00394}	0.00190137	1.418	0.003			472.667
BcAN_13303	Uncharacterized protein {ECO:0000313|EMBL:KOS42318.1}	0.00187428	1.439	0.003			479.667
BcAN_14585	50S ribosomal protein L33 {ECO:0000313|EMBL:ADR52070.1}	0.00184547	2.656	0.005			531.2
BcAN_22073	tRNA-specific 2-thiouridylase MnmA {ECO:0000256|HAMAP-Rule:MF_00144}	0.00181639	1.485	0.003			495
BcAN_07277		0.00180137	6.847	0.012			570.583
BcAN_12224	PREDICTED: vegetative cell wall protein gp1-like	0.00173752	4.544	0.008			568
BcAN_06777	30S ribosomal protein S11 {ECO:0000256|HAMAP-Rule:MF_01310}	0.00168926	1.596	0.003			532
BcAN_05515	PREDICTED: pupal cuticle protein-like	0.00168629	216.764	0.366			592.251
BcAN_10763		0.0016555	1.629	0.003			543
BcAN_22064	Flagellar basal-body rod protein FlgF {ECO:0000313|EMBL:KJZ82642.1}	0.00164827	1.636	0.003			545.333
BcAN_06336	Tyrosyl-tRNA synthetase, mitochondrial {ECO:0000313|EMBL:KJZ81601.1}	0.00160545	2.678	0.004			669.5
BcAN_23499	Phage tail fiber protein {ECO:0000313|EMBL:KJZ82490.1}	0.00152437	1.769	0.003			589.667
BcAN_01902	50S ribosomal protein L6 {ECO:0000256|HAMAP-Rule:MF_01365, ECO:0000256|RuleBase:RU003870}	0.00150842	5.091	0.008			636.375
BcAN_02325	Uncharacterized protein {ECO:0000313|EMBL:KJZ82270.1}	0.00148988	3.074	0.005			614.8
BcAN_01703	Uncharacterized protein {ECO:0000313|EMBL:ADR52211.1}	0.00147679	12.926	0.019			680.316
BcAN_07700	Outer membrane protein {ECO:0000313|EMBL:KJZ81968.1}	0.00129009	16.1	0.021			766.667
BcAN_01989	30S ribosomal protein S14 {ECO:0000256|HAMAP-Rule:MF_00537}	0.00124331	3.959	0.005			791.8
BcAN_02799		0.00121022	80.777	0.098			824.255
BcAN_14596	Flagellar hook protein FlgE {ECO:0000256|RuleBase:RU362116}	0.00117824	2.289	0.003			763
BcAN_11164	ATP synthase subunit beta {ECO:0000256|HAMAP-Rule:MF_01347}	0.00111998	3.703	0.004			925.75
BcAN_02233		0.00111408	24.098	0.027			892.519
BcAN_14588	Argininosuccinate lyase {ECO:0000256|HAMAP-Rule:MF_00006, ECO:0000256|SAAS:SAAS00211019}	0.00111241	2.424	0.003			808
BcAN_25345	Uncharacterized protein {ECO:0000313|EMBL:KJZ81753.1}	0.000978639	5.461	0.005			1092.2
BcAN_12054	Transcriptional regulator {ECO:0000313|EMBL:KJZ82419.1}	0.000963277	2.799	0.003			933
BcAN_11820	Transcription termination/antitermination protein NusA {ECO:0000256|HAMAP-Rule:MF_00945}	0.000952704	2.83	0.003			943.333
BcAN_11285	Uncharacterized protein {ECO:0000313|EMBL:KJZ82226.1}	0.000879583	4.619	0.004			1154.75
BcAN_24637	Phage protein {ECO:0000313|EMBL:KJZ81610.1}	0.000747748	6.922	0.005			1384.4
BcAN_02917		0.000737877	16.445	0.012			1370.42
BcAN_14583	Uncharacterized protein {ECO:0000313|EMBL:KJZ81885.1}	0.000729872	3.694	0.003			1231.33
BcAN_05961	Uncharacterized protein {ECO:0000313|EMBL:KJZ81778.1}	0.000722588	3.732	0.003			1244
BcAN_23120	PREDICTED: cuticle protein 65-like	0.000592135	44.99	0.027			1666.3
BcAN_11851	Uncharacterized protein {ECO:0000313|EMBL:KJZ82227.1}	0.000554455	4.863	0.003			1621
							#DIV/0!
